# Supplementary material
Source: Springer Nature journal article supplement (https://www.springermedizin.de/resource/supplementary/12913_2014_3541_MOESM3_ESM.pdf/9533148)
Supplement: MOESM3 [file 9533148]

**Additional File 3: Distinction between no disease and no severe disease**

(Only for data 2012, N = 310)

|                     |                          | Frequency |    | Percentage |    |
|---------------------|--------------------------|-----------|----|------------|----|
| Terminal disease    |                          | 12        |    | 4          |    |
| Severe disease      |                          | 107       |    | 35         |    |
| No (severe) disease |                          | 166       |    | 54         |    |
|                     | <i>No severe disease</i> |           | 89 |            | 29 |
|                     | <i>No disease</i>        |           | 77 |            | 25 |
| Unknown             |                          | 25        |    | 8          |    |
| Total N             |                          | 310       |    | 100        |    |

|                     |                          | Frequency |    | Percentage |    |
|---------------------|--------------------------|-----------|----|------------|----|
| No (severe) disease |                          | 166       |    | 100        |    |
|                     | <i>No severe disease</i> |           | 89 |            | 54 |
|                     | <i>No disease</i>        |           | 77 |            | 46 |
